# Supplementary material for: Attitudes and Practices Related to COVID-19 Vaccination with the Second Booster Dose among Members of Athens Medical Association: Results from a Cross-Sectional Study
Source: MDPI journal article supplement (doi:10.3390/vaccines11091480), 2023-09-12
Supplement: s1 [file s1]

# Attitudes and Practices Related to COVID-19 vaccination with the second booster dose (fourth dose)

We invite you to voluntarily participate in this anonymous online survey conducted by Athens Medical Association regarding your attitudes and practices related to vaccination against COVID-19 with the fourth (booster) dose. By completing the anonymous questionnaire below, I declare that I consent to the data of my answers being used for the purpose of the study.

## Demographics

### 1. Gender

Female  
Male

### 2. Age (years)

### 3. Employment status

Private sector  
Working in N.H.S.  
Working with the Greek Army  
Working in universities

## Attitudes and practices regarding vaccinations

### 4. The vaccines are important for Public Health

Fully Agree  
Agree  
Disagree  
Fully Disagree

### 5. In general, vaccines are safe.

Fully Agree  
Agree  
Disagree  
Fully Disagree

6. In general, vaccines are effective.

Fully Agree  
Agree  
Disagree  
Fully Disagree

7. I am concerned over vaccination side effects.

Fully Agree  
Agree  
Disagree  
Fully Disagree

8. Information received from the Greek Public Health Authorities regarding COVID-19 vaccination with the fourth dose were reliable.

Fully Agree  
Agree  
Disagree  
Fully Disagree

9. What was your source of information regarding the fourth dose of COVID-19 vaccine? (One answer)

Website of A.M.A.  
Scientific Journals  
(WHO, CDC, ECDC  
Television/Radio  
Social Media  
Website of N.H.S.  
Independent websites

10. Have you been vaccinated against COVID-19 with the fourth dose?

Yes  
No

11. If no, explain why. One answer

Non-obligation of the fourth dose  
History of 3 doses of the vaccine  
Insufficient information for the fourth dose

12. Which of the following factors affected your opinion regarding the uptake of COVID-19 vaccine? (One answer)

Fear of side effects

I am not at risk of COVID-19 disease

The time of the development of the vaccines was short

Receiving homeopathy medication

Pending vaccination appointment

I oppose to vaccinations

13. Are you willing to do the fourth dose of COVID-19 vaccine?

Yes

No

14. Have you been vaccinated with the influenza vaccine for season 2022-2023?

Yes

No

15. Do you agree with the initial mandatory vaccination schedule against COVID-19 for medical personnel to protect public health?

Yes

No
